# Supplementary material
Source: publisher figshare collection journal article supplement (https://gsajournals.figshare.com/ndownloader/files/28693599)
Supplement: Supplementary file 1 [file 28693599]

## Sheet: File S1
File S1: List of all 25 Pseudoalteromonas genomes used in this study
Assembly accession	Species	Number of CDS´s per genome	Genome size (nt)	Number of replicons (plasmids excluded)	Plasmid(s)
GCF_002310855.1	Pseudoalteromonas agarivorans DSM 14585	4098	4544962	2
GCF_001999225.1	Pseudoalteromonas aliena EH1	4064	4594697	2
GCF_000238395.3	Pseudoalteromonas arctica A 37-1-2	4232	4721971	2	unnamed plasmid
GCF_002221525.1	Pseudoalteromonas espejiana DSM 9414 ATCC 29659	4000	4500451	2
GCF_000310105.2	Pseudoalteromonas fuliginea Bsw20308	4235	4830226	2
GCF_001455325.1	Pseudoalteromonas issachenkonii KCTC 12958	3756	4131541	2
GCF_002310795.1	Pseudoalteromonas issachenkonii KMM 3549	3728	4132618	2
GCF_001750185.1	Pseudoalteromonas luteoviolacea S4054	5309	6221248	2
GCF_001750405.1	Pseudoalteromonas luteoviolacea S40542	5311	6221346	2
GCF_001750165.1	Pseudoalteromonas luteoviolacea S4054249	5313	6223983	2
GCF_002221505.1	Pseudoalteromonas nigrifaciens KMM 661	3941	4274777	2	plasmid
GCF_001444405.1	Pseudoalteromonas phenolica KCTC 12086	4249	4868993	2
GCF_000788395.1	Pseudoalteromonas piratica OCN003	4384	4815987	2
GCF_002208135.1	Pseudoalteromonas piscicida DE2-B	4900	5317048	2
GCF_001482385.1	Pseudoalteromonas rubra SCSIO 6842	5055	5913780	2	pMBL6842
GCF_002407505.1	Pseudoalteromonas sp. 1_2015MBL_MicDiv	4290	4859883	2
GCF_001468205.2	Pseudoalteromonas sp. 13-15	3707	4099967	2
GCF_002850255.1	Pseudoalteromonas sp. NC201	4591	5378320	2
GCF_000184065.1	Pseudoalteromonas sp. SM9913	3684	4037671	2
GCF_002814155.1	Pseudoalteromonas spongiae SAO4-4	4656	5099119	2	pI
GCF_000238255.3	Pseudoalteromonas spongiae UST010723-006	4252	4752413	2
GCF_002310835.1	Pseudoalteromonas tetraodonis GFC	3735	4128400	2
GCF_001465295.1	Pseudoalteromonas translucida KMM 520	3769	4147593	2
GCF_000026085.1	Pseudoalteromonas translucida TAC125	3481	3850272	2
GCF_002310815.1	Pseudoalteromonas tunicata D2	4347	4959443	2
